# Supplementary material for: Single-Cell Immunogenomic Approach Identified SARS-CoV-2 Protective Immune Signatures in Asymptomatic Direct Contacts of COVID-19 Cases
Source: Front Immunol. 2021 Nov 25;12:733539. doi: 10.3389/fimmu.2021.733539 (PMC8660575; doi:10.3389/fimmu.2021.733539)
Supplement: Supplementary file 1 [file Table_1.xlsx]

## Sheet: Control samples 
Sl.no	Sample ID	Age	Sex	Status of infectivity
1	Cntrl_001	32	M	RT-PCR negative
2	Cntrl_002	35	M	RT-PCR negative
3	Cntrl_003	26	M	RT-PCR negative
4	Cntrl_004	29	M	RT-PCR negative
5	Cntrl_007	34	M	RT-PCR negative
6	Cntrl_008	39	M	RT-PCR negative
7	Cntrl_009	29	M	RT-PCR negative
8	Cntrl_010	26	M	RT-PCR negative
9	Cntrl_011	27	F	RT-PCR negative
10	Cntrl_012	35	F	RT-PCR negative
11	Cntrl_013	38	F	RT-PCR negative
12	Cntrl_014	28	F	RT-PCR negative
13	Cntrl_015	26	F	RT-PCR negative
14	Cntrl_016	31	F	RT-PCR negative

## Sheet: Infected samples
Sl.no	Sample ID	Age	Sex	Infection Category	Status of Infectivity
1	CV0001	24	F	ASY	RT-PCR positive
2	CV0002	28	M	ASY	RT-PCR positive
3	CV0003	20	M	SYM	RT-PCR positive
4	CV0004	25	M	SYM	RT-PCR positive
5	CV0005	25	M	SYM	RT-PCR positive
6	CV0006	20	M	SYM	RT-PCR positive
7	CV0007	28	M	ASY	RT-PCR positive
8	CV0008	40	M	ASY	RT-PCR positive
9	CV0009	21	F	ASY	RT-PCR positive
10	CV0010	30	F	ASY	RT-PCR positive
11	CV0011	41	M	SYM	RT-PCR positive
12	CV0012	58	M	SYM	RT-PCR positive
13	CV0013	20	F	ASY	RT-PCR positive
14	CV0015	32	M	ASY	RT-PCR positive
15	CV0016	24	F	SYM	RT-PCR positive
16	CV0017	4	F	ASY	RT-PCR positive
17	CV0018	45	M	ASY	RT-PCR positive
18	CV0019	24	F	ASY	RT-PCR positive
19	CV0020	25	F	ASY	RT-PCR positive
20	CV0022	21	F	ASY	RT-PCR positive
21	CV0023	50	M	SYM	RT-PCR positive
22	CV0024	41	M	SYM	RT-PCR positive
23	CV0025	41	M	SYM	RT-PCR positive

## Sheet: Contact samples
Sl.no	Sample ID	Age	Sex	Contact Samples
1	CV0026	25	M	Close contact
2	CV0027	24	M	Close contact
3	CV0028	32	M	Close contact
4	CV0029	42	F	Close contact
5	CV0030	50	M	Close contact
6	CV0031	28	M	Close contact
7	CV0032	34	M	Close contact
8	CV0034	26	M	Close contact
9	CV0035	22	M	Close contact
10	CV0036	38	M	Close contact
11	CV0037	56	M	Close contact
12	CV0038	44	M	Close contact
13	CV0039	49	F	Close contact
14	CV0040	47	M	Close contact
15	CV0041	26	M	Close contact
16	CV0042	27	M	Close contact
17	CV0043	41	M	Close contact
18	CV0044	39	M	Close contact
19	CV0045	31	M	Close contact
20	CV0046	28	M	Close contact
21	CV0047	24	M	Close contact
22	CV0048	35	M	Close contact
23	CV0049	38	M	Close contact
24	CV0050	37	M	Close contact

## Sheet: IgA values
Sl.no	Sample ID	IgA Values
1	Cntrl_001	19.0909
2	Cntrl_002	19.5455
3	Cntrl_003	27.9545
4	Cntrl_004	39.0909
5	Cntrl_007	21.5909
6	Cntrl_008	18.6364
7	Cntrl_009	40.6818
8	Cntrl_010	15.2273
9	Cntrl_011	17.0455
10	Cntrl_012	19.0909
11	Cntrl_013	22.5
12	Cntrl_014	26.5909
13	Cntrl_015	41.8182
14	Cntrl_016	28.6364
15	CV0001	23.2609
16	CV0002	19.3478
17	CV0003	47.3913
18	CV0004	9.34783
19	CV0005	171.522
20	CV0006	42.3913
21	CV0007	17.3913
22	CV0008	18.913
23	CV0009	175.217
24	CV0010	36.7391
25	CV0011	129.348
26	CV0012	36.7391
27	CV0013	24.7826
28	CV0015	12.3913
29	CV0016	31.5217
30	CV0017	147.609
31	CV0018	58.913
32	CV0019	51.5217
33	CV0020	26.5217
34	CV0022	21.9565
35	CV0023	154.565
36	CV0024	76.087
37	CV0025	30.8696
38	CV0026	37.1739
39	CV0027	115
40	CV0028	55.8696
41	CV0029	67.8261
42	CV0030	168.261
43	CV0031	32.1739
44	CV0032	177.609
45	CV0034	155
46	CV0035	195.217
47	CV0036	120.87
48	CV0037	148.261
49	CV0038	156.957
50	CV0039	180.652
51	CV0040	185.217
52	CV0041	181.522
53	CV0042	141.739
54	CV0043	113.478
55	CV0044	99.1304
56	CV0045	171.522
57	CV0046	21.5217
58	CV0047	46.5217
59	CV0048	120.217
60	CV0049	112.391
61	CV0050	94.7826

## Sheet: IgG values
Sl.no	Sample ID	IgG Values
1	Cntrl_001	46.8432
2	Cntrl_002	64.7658
3	Cntrl_003	30.5499
4	Cntrl_004	39.1039
5	Cntrl_007	31.7719
6	Cntrl_008	34.2159
7	Cntrl_009	42.7699
8	Cntrl_010	33.8086
9	Cntrl_011	82.2811
10	Cntrl_012	72.0978
11	Cntrl_013	60.6925
12	Cntrl_014	85.947
13	Cntrl_015	75.3564
14	Cntrl_016	47.2505
15	CV0001	170.265
16	CV0002	26.8839
17	CV0003	119.756
18	CV0004	NA
19	CV0005	413.035
20	CV0006	66.3951
21	CV0007	35.4379
22	CV0008	52.1385
23	CV0009	372.301
24	CV0010	26.8839
25	CV0011	170.672
26	CV0012	48.8798
27	CV0013	40.7332
28	CV0015	34.2159
29	CV0016	49.2872
30	CV0017	59.0631
31	CV0018	88.7984
32	CV0019	141.344
33	CV0020	46.8432
34	CV0022	43.9919
35	CV0023	87.169
36	CV0024	24.0326
37	CV0025	46.8432
38	CV0026	34.6232
39	CV0027	105.092
40	CV0028	297.76
41	CV0029	553.564
42	CV0030	434.623
43	CV0031	129.939
44	CV0032	112.424
45	CV0034	102.24
46	CV0035	120.978
47	CV0036	269.246
48	CV0037	402.444
49	CV0038	92.8717
50	CV0039	538.9
51	CV0040	90.4277
52	CV0041	1061.1
53	CV0042	63.5438
54	CV0043	402.851
55	CV0044	196.334
56	CV0045	868.432
57	CV0046	478.208
58	CV0047	116.09
59	CV0048	859.063
60	CV0049	669.654
61	CV0050	115.682

## Sheet: IgM values 
Sl.no	Sample ID	IgM Values
1	Cntrl_001	59.7826
2	Cntrl_002	28.4783
3	Cntrl_003	79.1304
4	Cntrl_004	110.652
5	Cntrl_007	48.6957
6	Cntrl_008	125
7	Cntrl_009	119.783
8	Cntrl_010	22.1739
9	Cntrl_011	161.739
10	Cntrl_012	14.5652
11	Cntrl_013	69.5652
12	Cntrl_014	51.3043
13	Cntrl_015	35.8696
14	Cntrl_016	50
15	CV0001	104.211
16	CV0002	57.3684
17	CV0003	78.7719
18	CV0004	10.5263
19	CV0005	165.439
20	CV0006	114.211
21	CV0007	58.5965
22	CV0008	111.053
23	CV0009	189.825
24	CV0010	42.1053
25	CV0011	157.719
26	CV0012	101.754
27	CV0013	64.2105
28	CV0015	91.5789
29	CV0016	85.7895
30	CV0017	123.333
31	CV0018	84.9123
32	CV0019	67.193
33	CV0020	32.9825
34	CV0022	27.8947
35	CV0023	155.088
36	CV0024	114.737
37	CV0025	66.6667
38	CV0026	61.7544
39	CV0027	101.93
40	CV0028	103.158
41	CV0029	133.86
42	CV0030	177.193
43	CV0031	63.1579
44	CV0032	126.316
45	CV0034	106.667
46	CV0035	96.1404
47	CV0036	80.5263
48	CV0037	184.211
49	CV0038	129.649
50	CV0039	165.088
51	CV0040	126.667
52	CV0041	171.754
53	CV0042	138.772
54	CV0043	60.1754
55	CV0044	107.544
56	CV0045	119.298
57	CV0046	121.228
58	CV0047	110.877
59	CV0048	77.7193
60	CV0049	55.614
61	CV0050	145.965

## Sheet: Total Covid Ab 
	Sl.no	Sample ID	Total Covid Ab
	1	Cntrl_001	22.8333
	2	Cntrl_002	19.1
	3	Cntrl_003	1.63333
	4	Cntrl_004	2.93333
	5	Cntrl_007	4.73333
	6	Cntrl_008	7.73333
	7	Cntrl_009	15.3
	8	Cntrl_010	6.83333
	9	Cntrl_011	22.5
	10	Cntrl_012	6.1
	11	Cntrl_013	13.7
	12	Cntrl_014	11.7333
	13	Cntrl_015	12.3333
	14	Cntrl_016	4.86667
	15	CV0001	9.95902
	16	CV0002	1.84426
	17	CV0003	5.45082
	18	CV0004	6.39344
	19	CV0005	115.041
	20	CV0006	11.5574
	21	CV0007	1.7623
	22	CV0008	1.84426
	23	CV0009	101.025
	24	CV0010	1.80328
	25	CV0011	110.738
	26	CV0012	2.29508
	27	CV0013	1.63934
	28	CV0015	1.72131
	29	CV0016	106.23
	30	CV0017	35
	31	CV0018	9.59016
	32	CV0019	33.7705
	33	CV0020	22.5
	34	CV0022	2.62295
	35	CV0023	44.5902
	36	CV0024	66.6803
	37	CV0025	1.72131
	38	CV0026	2.62295
	39	CV0027	5.04098
	40	CV0028	82.3361
	41	CV0029	104.385
	42	CV0030	136.721
	43	CV0031	17.582
	44	CV0032	81.1066
	45	CV0034	69.877
	46	CV0035	42.2541
	47	CV0036	16.2295
	48	CV0037	80.6148
	49	CV0038	105.451
	50	CV0039	65.8197
	51	CV0040	48.3607
	52	CV0041	81.5984
	53	CV0042	142.213
	54	CV0043	43.0328
	55	CV0044	42.0902
	56	CV0045	43.1557
	57	CV0046	55.082
	58	CV0047	21.8852
	59	CV0048	7.0082
	60	CV0049	50.2049
	61	CV0050	90.3689

## Sheet: BIOPLEX
Sl.no	Sample ID	CTACK..72.	Eotoxin..43.	Basic.FGF..44.	G.CSF..57.	GM.CSF..34.	GRO.alpha..61.	HGF..62.	IFN.alpha2..20.	IFN.gamma..21.	IL.1alpha..63.	IL.1beta..39.	IL.1ra..25.	IL.2..38.	IL.2ra..13.	IL.3..64.	IL.4..52.	IL.5..33.	IL.6..19.	IL.7..74.	IL.8..54.	IL.9..77.	IL.10..56.	IL.12.p70...75.	IL.12.p40...28.	IL.13..51.	IL.15..73.	IL.16..27.	IL.17..76.	IL.18..42.	IP.10..48.	LIF..29.	MCP.1..53.	MCP.3..26.	M.CSF..67.	MIF..35.	MIG..14.	MIP.1a..55.	MIP.1b..18.	beta.NGF..46.	PDGF.bb..47.	RANTES..37.	SCF..65.	SCGF.b..78.	SDF.1a..22.	TNF.a..36.	TNF.b..30.	TRAIL..66.	VEGF..45.
1	Cntrl_001	2986.63	234.1	110.38	760.97	6.25	3077.4	925.31	16.41	280.81	9.34	2.96	65.14	0.97	305.13	1.54	10.5	955.2	6.92	325.65	4.24	1069.46	1.75	0.89	198.65	16.09	834.1	149.74	17.54	160.78	1480.88	30.66	27.09	4.86	63.11	5664.22	209.27	7.3	753.59	69.65	6405.93	28358.3	205.26	388598	6399.12	199.25	1937.66	27.23	362.38
2	Cntrl_002	5361.22	196.18	130.79	184.77	6.25	3077.4	1730.22	16.41	280.81	9.34	2.96	65.14	0.97	305.13	1.54	1.12	955.2	6.92	539.93	4.24	985.02	1.75	0.89	103.27	0.21	834.1	182.46	17.54	147.26	335.22	293	184.65	4.86	63.11	9327.24	4017.72	9.84	1072.67	69.65	16049	3.79601e+06	243.03	657076	4149.02	26.96	2599.95	331.09	767.6
3	Cntrl_003	3201.87	360.52	8.78	1195.58	6.25	3077.4	2162.04	12.7	280.81	9.34	2.96	65.14	0.97	305.13	1.54	15.41	955.2	6.92	442.03	162.59	1466.75	40.56	0.87	103.27	0.21	834.1	182.46	17.54	113.37	335.22	122.65	364.41	4.86	63.11	5578.31	209.27	42.19	1042.92	69.65	9123.68	104987	267.87	503917	5366.31	188.04	2743.84	23.51	362.38
4	Cntrl_004	1785.58	117.2	8.78	280.36	6.25	3077.4	1632.58	16.41	280.81	9.34	2.96	819.07	0.97	305.13	1.54	12.21	955.2	6.92	279.87	446.48	1984.98	10.73	15.18	307.71	0.21	834.1	224.92	17.54	150.64	335.22	122.65	235.3	4.86	63.11	862.86	312.44	24.57	869.08	69.65	6762.41	130767	100.27	342936	4655.2	221.51	2205.52	230.2	362.38
5	Cntrl_007	4076.88	428.55	35.13	152.97	6.25	3077.4	1730.22	16.41	280.81	432.18	2.96	1045	0.97	305.13	12.21	1.68	955.2	6.92	367.3	4.24	3804.77	1.75	0.89	103.27	0.85	834.1	266.35	17.54	133.72	335.22	1219.29	385.55	4.86	63.11	862.86	265.68	1.27	1039.72	69.65	10092.1	309729	255.48	476939	5634.58	154.02	2521.41	230.2	3034.93
6	Cntrl_008	3885.73	435.38	64	216.6	6.25	16697.2	1632.58	16.41	280.81	521.53	21.12	65.14	0.97	305.13	1.54	12.21	955.2	6.92	508.77	4.24	3061	10.73	0.89	6117.23	12.05	834.1	92.83	17.54	150.64	335.22	30.66	194.3	4.86	63.11	5309.66	38.98	27.27	872.37	69.65	11928.4	533240	133.94	577949	7503.58	142.53	2848.52	700.38	362.38
7	Cntrl_009	2792.21	131.78	150.03	272.38	6.25	3077.4	1435.12	16.41	280.81	9.34	2.96	65.14	0.97	305.13	1.54	8.67	955.2	6.92	166.15	4.24	1597.49	1.75	0.89	103.27	0.21	834.1	256.08	17.54	191.12	335.22	823.72	174.76	4.86	63.11	862.86	183.61	27.91	892.06	69.65	9963.96	29238.2	173.22	500223	3569.66	456.5	2639.2	27.23	362.38
8	Cntrl_010	3158.89	388.54	88.39	809.19	6.25	3077.4	1632.58	16.41	280.81	9.34	2.96	65.14	0.97	305.13	1.54	1.12	955.2	6.92	166.15	4.24	1515.4	1.75	0.89	103.27	0.21	834.1	182.46	17.54	187.76	3117.58	122.65	399.35	4.86	63.11	4520.15	116.75	31.24	904.05	69.65	8599.06	3.64598e+06	179.67	380893	5095.29	159.73	2005.24	27.23	362.38
9	Cntrl_011	1271.29	140.67	8.78	1.73	6.25	3077.4	819.67	12.7	280.81	9.34	2.96	65.14	0.97	305.13	1.54	1.12	955.2	6.92	69.97	4.24	876.39	1.75	0.89	142	0.21	834.1	10.91	17.54	24.26	335.22	122.65	27.09	4.86	63.11	862.86	19.59	19.13	485.09	69.65	2084.66	21966.7	43.48	219758	3599.12	65.31	1443.2	27.23	362.38
10	Cntrl_012	7579.5	311.88	35.13	1179.46	6.25	3077.4	1435.12	38.72	280.81	9.34	1.39	936.23	3.89	305.13	2.22	4.47	3539.59	6.92	442.03	254.57	2125.25	10.73	0.89	103.27	7.84	834.1	116.03	17.54	201.22	335.22	122.65	342.69	4.86	63.11	6791.17	603.61	66.51	1004.47	69.65	9513.16	118078	274.04	621931	5767.76	287.18	2619.58	262.1	836.87
11	Cntrl_013	3029.74	529.43	64	1.73	6.25	3077.4	2019.36	16.41	280.81	9.34	15.01	936.23	0.97	305.13	1.54	1.12	955.2	6.92	279.87	66.27	2740.62	1.75	0.89	83	0.21	834.1	235.37	17.54	194.49	2877.58	1219.29	399.35	4.86	63.11	5044.83	559.25	8.22	1047.18	69.65	12805.2	641034	322.94	719324	7044.88	210.41	1814.62	397.13	2400.03
12	Cntrl_014	9301.08	306.06	8.78	897.64	6.25	3077.4	977.59	12.7	1519.97	728.54	2.96	65.14	2.45	305.13	8.91	1.12	955.2	6.92	279.87	4.24	2721.83	1.75	18.74	253.75	0.85	834.1	245.75	17.54	120.16	335.22	574.8	308.86	69.24	63.11	862.86	183.61	11.92	1000.19	69.65	10666	195376	236.78	465246	4205.91	199.25	2475.54	230.2	2423.16
13	Cntrl_015	3758.03	278.08	8.78	184.77	6.25	3077.4	1923.57	16.41	280.81	9.34	2.96	65.14	0.97	305.13	1.54	1.12	955.2	6.92	69.97	4.24	1487.68	1.75	0.89	103.27	0.21	834.1	104.52	17.54	194.49	335.22	30.66	120.54	69.24	63.11	5167.82	183.61	19.13	964.72	69.65	3673.02	46065.3	261.68	362033	4262.63	107.54	2730.76	27.23	362.38
14	Cntrl_016	5088.97	402.41	88.39	1002.25	6.25	3077.4	657.98	57.42	280.81	9.34	2.96	65.14	0.97	305.13	1.54	6.69	955.2	6.92	508.77	190.53	1711.47	1.75	0.89	103.27	0.21	834.1	127.4	17.54	315.19	2707.68	293	148.8	4.86	63.11	6972.1	6048.01	40.1	1135	69.65	10602.5	159214	192.51	424522	6399.12	227.04	2198.9	47.64	362.38
15	CV0001	4205.31	77.16	14.16	65.92	4.81	NA	1445.29	43.62	81.64	103.77	987.88	98.99	117.63	312.88	0.03	10.49	2.3	9.07	89.43	5.81	NA	1.5	43.42	183.22	19.44	201.91	470.91	0.76	334.6	3483.69	327.29	20.38	7.8	179.13	132.48	2194.41	4.1	1300.14	69.14	10498.8	149775	226.74	1.09536e+06	NA	195.66	1570	2477.56	700.65
16	CV0002	9175.99	215.43	125.3	164.64	4.81	NA	1162.2	43.62	518.15	103.77	987.88	936.01	117.63	266.54	0.03	2.3	NA	12.5	55.16	61.6	3942.69	37.68	7.17	179.18	25.46	201.91	139.22	16.61	362.76	2240.73	3.01	157.31	74.78	155.08	27446	2837.7	4.1	1452.67	218	10987	134256	276.24	594396	5342.42	220.51	NA	1884.75	700.65
17	CV0003	6068.22	NA	26.12	355.58	NA	NA	1722.73	7.31	NA	NA	982.99	NA	NA	NA	NA	9.21	NA	11.81	684.55	104.71	NA	1.5	7.17	431.54	25.46	NA	668.16	0.76	NA	5429.94	327.29	NA	NA	NA	11254.6	4861.01	13.05	NA	NA	14730.9	171202	162.3	656174	NA	NA	NA	3512.83	NA
18	CV0004	11942.7	710.79	82.15	348.8	79.86	21609.4	1630.8	43.62	518.15	103.77	941.06	1408.13	49.86	312.88	0.11	19.53	2.3	21.78	632.37	67.17	4098.91	17.52	7.17	183.22	33.64	NA	408.7	0.76	480.83	3483.69	183.53	470.65	142.97	104.14	17369.6	2065.46	3.16	1751.13	NA	17023.7	63896.7	377.53	833803	8888.35	165.54	2646.57	2132.23	700.65
19	CV0005	9495.48	826.9	36.76	NA	4.81	20044.8	638.72	239.48	241.29	103.77	992.06	288.34	1.4	433.86	0.11	4.95	2.3	NA	1091.09	125.31	NA	1.5	7.17	183.22	3.16	2295.03	408.7	32.15	390.76	2188.14	588.96	104.85	52.56	260.26	NA	1225.27	8.67	1514.6	462.24	7768.61	143623	176.71	837564	6353.3	298.74	4217.39	2521.13	700.65
20	CV0006	2838.93	188.48	110.13	246.9	33.26	21723.2	1476.37	78.76	184.38	282.52	1009.32	782.7	165.9	408.81	20.92	10.49	2.3	16.02	314.53	32.44	7039.11	25.48	7.17	183.22	22.53	1850.17	318.97	32.15	1183.45	4727.06	372.75	154	131.54	366.04	5383.86	2357.81	8.33	1390.52	171.28	11095.1	214906	248.01	769853	6837.73	170.59	1950.71	3022.34	700.65
21	CV0007	7799.88	911.37	102.34	321.68	4.81	21767.4	969.51	NA	313.94	103.77	992.06	1154.64	841.91	23.99	0.03	7.88	NA	2.57	1000.14	32.44	4623.1	1.5	1.51	945.31	12.63	1901.95	NA	NA	376.78	4949.65	NA	119.52	94.94	59.54	132.48	3104.05	8.67	1417.51	274.05	11364.4	172872	484.47	808979	19287.5	215.55	18.54	3359.66	4104.07
22	CV0008	4698.92	367.94	14.16	164.64	33.26	21365.3	1320.25	74.04	144.82	282.52	1026.09	2048.5	12.56	69.54	14.75	23.56	2.3	6.39	578.88	67.17	2755.22	9.75	7.17	183.22	19.44	201.91	1875.44	0.76	362.76	4260.35	76.42	225.58	67.65	366.04	NA	5259.13	0.45	1718.27	194.89	10498.8	115039	422.52	617002	NA	200.65	2457.62	2124.8	700.65
23	CV0009	8090.56	379.89	31.55	416.56	66.86	NA	1034.14	49.01	124.38	572.15	959.02	288.34	1.4	973.75	8.13	15.22	2.3	16.02	906.65	5.76	2412.57	5.98	7.17	183.22	31	229.82	579.82	0.76	348.7	9090.41	712.39	186.18	NA	182.51	24229.1	3230.82	9.67	2753.23	NA	12801.9	125224	367.12	637343	NA	259.84	3693	3568.32	700.65
24	CV0010	5256.89	164.77	136.37	552.11	NA	21700.8	3878.5	83.41	NA	176.47	995.71	1693.28	123.07	538.22	4.49	15.22	NA	NA	89.43	115.08	1943.24	13.6	7.17	183.22	25.46	955.56	NA	270.6	501.44	21806.5	280.77	309.35	NA	NA	3874.35	1351.74	9.99	1910.76	349.31	14421	185269	419.07	552187	NA	441.7	5753.67	3906.03	3293.1
25	CV0011	8118.11	386.68	73.72	552.11	45.41	NA	1844.53	7.31	278.01	103.77	1017.08	2048.5	49.86	561.49	0.03	15.22	274.72	5.09	408.15	264.57	5047.08	1.5	7.17	1014.29	25.46	1093.34	1011.35	125.79	623.89	3413.1	630.53	439.97	NA	406.67	11254.6	8496.84	6.54	2200.85	200.71	16922.9	238442	450.1	850350	NA	308.41	3681.65	3135.29	700.65
26	CV0012	6200.83	106.4	65.04	199.04	7.29	NA	2264.69	38.05	25.84	633.06	959.02	885.68	37.88	607.27	0.03	7.88	NA	NA	330.66	32.44	2422.69	13.6	7.17	183.22	19.44	3402.73	408.7	0.76	1572.76	3193.94	792.75	3.98	131.54	443.74	24229.1	2837.7	4.1	1657.13	12.8	9676.65	45957.2	240.93	898478	13708.4	160.48	1505.23	2080.12	7674.47
27	CV0013	4604.4	200.12	86.28	28.23	41.5	NA	1225.67	43.62	25.84	103.77	NA	477.63	NA	425.55	0.03	7.88	2.3	39.74	247.27	55.95	4079.4	37.68	NA	NA	31	1690.52	245.6	0.76	521.98	2439.8	504.33	89.5	113.74	231.75	5644.11	1786.79	3.64	2323.43	115.8	12854.6	382502	304.33	1.07733e+06	6353.3	NA	NA	4389.5	700.65
28	CV0015	5026.23	256.51	56.04	129.92	4.81	NA	604.77	49.01	NA	478.84	NA	985.65	139.28	154.77	4.49	7.88	2.3	13.9	NA	5.76	9248.84	25.48	7.17	183.22	3.16	201.91	344.97	0.76	334.6	7877.7	12.04	170.33	142.97	168.91	132.48	4533.15	12.46	974.37	109.37	22485.5	160474	339.28	632070	NA	663.84	NA	NA	700.65
29	CV0016	7869.33	152.66	82.15	633.61	33.26	19612.2	2145.53	49.01	615.1	447.13	1003.26	1362.98	106.67	374.74	13.15	10.49	2.3	42.04	452.56	19.81	6115.34	21.48	7.17	183.22	3.16	728.72	1011.35	0.76	404.71	10654.4	504.33	176.72	52.56	348.37	8978.87	1786.79	5.77	887.21	206.5	12113.2	62819.9	276.24	772111	12951.7	356.42	18.54	3163.45	700.65
30	CV0017	10774.6	601.98	65.04	14.65	4.81	NA	937.03	69.24	349.21	103.77	995.71	729.89	73.07	266.54	NA	2.3	2.3	13.9	578.88	38.49	3074.93	5.98	7.17	183.22	22.53	1465.77	621.29	1.12	623.89	6035.82	712.39	140.53	44.45	234.95	8669.41	12766.3	5.77	2083.45	462.24	10607.6	196688	353.21	597411	11687.4	150.33	3077.31	NA	69247.2
31	CV0018	8623.83	401.88	26.12	1973.08	7.29	18794.8	672.48	74.04	103.37	103.77	NA	729.89	73.07	95.97	NA	16.33	2.3	NA	362.24	120.21	3154.48	1.5	7.17	267.52	3.87	2388.32	370.67	0.76	249.03	3755.65	792.75	245.9	NA	247.67	5229.9	8119.01	6.54	1700.6	306.7	7019.56	115189	293.81	434504	4743.53	140.13	3568.22	4551.57	700.65
32	CV0019	6911.37	728.87	125.3	996.28	24.22	NA	1225.67	110.02	278.01	212.69	977.08	2007.58	NA	408.81	2.5	4.95	2.3	NA	810.2	NA	5716.44	13.6	5.64	267.52	12.63	201.91	811.53	0.76	334.6	3483.69	3.01	430.4	88.39	360.17	7240.58	2397.32	NA	2567.68	295.89	23349.9	195044	443.21	405812	NA	342.07	NA	2965.66	700.65
33	CV0020	7096.88	296.33	46.66	362.36	4.81	NA	2085.7	43.62	241.29	103.77	995.71	1034.65	95.6	433.86	NA	15.22	2.3	14.6	592.38	55.95	2955.33	13.6	7.17	183.22	36.2	3244.46	1357.71	0.76	13.44	5912.33	280.77	373.95	101.33	NA	18211	2512.94	7.27	1887.8	NA	12643.5	69951.1	251.55	NA	10885.1	327.67	2346.85	3665.18	NA
34	CV0022	13365.2	256.51	14.16	735.77	4.81	22336.4	4822.88	174.19	907.84	103.77	990.04	4665.82	49.86	538.22	0.11	19.53	2.3	144.16	953.74	227.45	4419.78	1.5	7.17	804.71	31	807.64	978.51	0.76	1008.32	105915	461.17	572.44	154.09	460.65	33094.6	3473.57	7.27	1988.96	NA	17074.1	300054	321.83	1.52905e+06	NA	394.49	3602.23	4585.25	NA
35	CV0023	4091.94	84.08	26.12	369.14	4.81	NA	1874.84	7.31	451.85	103.77	NA	564.87	233.42	872.45	NA	19.53	11.21	NA	314.53	44.41	4157.38	1.5	7.17	183.22	19.44	2003.58	279.32	1.12	NA	1480.03	372.75	20.38	NA	215.6	50716.3	1634.17	9.34	2275.39	251.9	4120.42	80269.6	248.01	336301	NA	150.33	2225.37	2250.65	4577.53
36	CV0024	7238.78	127.84	41.79	253.71	4.81	23048	2880.51	12.5	124.38	10.61	252.86	NA	NA	553.76	NA	NA	NA	NA	467.08	19.81	NA	21.48	7.17	431.54	3.16	2295.03	1141.12	NA	784.57	4290.5	671.66	119.52	175.58	426.7	NA	5875.74	NA	1667.21	NA	21130.1	214348	415.61	699851	6168.3	190.67	3082.93	3135.29	NA
37	CV0025	6897.05	406.92	36.76	14.65	37.46	20948.7	1569.22	NA	NA	100.02	993.94	1757.27	176.44	474.74	0.03	18.48	2.3	NA	537.77	160.31	3628.9	33.59	7.17	183.22	36.2	201.91	1076.55	0.76	299.17	5112.67	372.75	89.5	NA	195.88	55511	3323.45	11.25	2243.06	89.66	23923.3	150128	286.79	985673	5079.32	109.18	NA	1808.78	NA
38	CV0026	7772.06	207.8	73.72	879.41	33.26	20044.8	2175.39	92.5	313.94	103.77	941.06	1628.65	49.86	187.04	0.03	2.3	2.3	16.73	495.71	83.54	3942.69	13.6	7.17	875.48	22.53	201.91	531.85	NA	508.29	3553.17	76.42	216.69	NA	241.33	18657.5	2357.81	48.52	NA	472.25	16922.9	195079	381	352930	14081.3	279.34	2137.25	2287.46	5152.04
39	CV0027	11336.9	1596.7	98.39	2949.56	149.54	21977.7	5477.91	78.76	468.56	447.13	252.86	2978.5	223.17	732.3	7.25	23.56	2.3	NA	1588.03	722.08	6418.01	5.98	5.64	804.71	41.14	1953.08	603.58	596.28	NA	4783.31	1026.66	1070.01	35.8	357.23	65440.4	3759.82	97.1	2800.9	526.67	32201.1	335416	187.49	1.18547e+06	39746.9	284.2	836.41	3317.74	12545.7
40	CV0028	5605.91	521.51	51.4	797.24	73.46	21712	1066.3	19.65	222.59	10.61	252.86	1862.62	NA	522.55	15.54	15.22	NA	0.8	1212.6	32.44	4059.89	1.5	7.17	183.22	3.16	201.91	731.78	0.76	590.07	4138.28	588.96	262.91	7.8	303.42	132.48	2732.76	18.51	2.01	NA	15039.7	221374	237.39	440543	NA	220.51	3116.65	3043.56	12949.1
41	CV0029	7422.26	519.91	20.37	5721.12	101	21632.5	NA	3.89	892.86	10.61	995.71	1757.27	31.76	584.5	9.84	25.5	2.3	23.24	605.8	NA	NA	1.5	7.17	431.54	59.14	1580.03	579.82	NA	277.76	3886.21	910.92	189.3	35.8	162.03	44950.5	1087.85	170.6	1807.32	531.57	12590.6	260537	212.51	320424	9956.89	507.19	2457.62	NA	8325.7
42	CV0030	6652.5	707.77	164.87	2831.27	33.26	NA	5042.19	7.31	NA	NA	985.54	NA	NA	348.61	8.13	12.92	61.17	30.65	658.62	710.05	6757.3	5.98	7.17	509.49	25.46	2003.58	811.53	0.76	487.7	3413.1	546.91	213.7	NA	263.39	35440.8	2768.08	59.96	2682.61	NA	28899.7	285564	494.76	411854	11288.8	NA	4114.48	4226.78	700.65
43	CV0031	14465.3	411.95	121.55	450.43	4.81	19271.2	706.07	7.31	222.59	212.69	NA	782.7	NA	294.59	0.03	1.27	2.3	3.18	605.8	44.41	4758.29	21.48	9.81	183.22	3.16	2247.71	737.52	NA	362.76	6937.61	3.01	675.05	107.6	266.51	21077.1	3384.11	7.98	2021.39	306.7	16468.1	329097	276.24	742007	NA	562.84	2535.32	2901.72	700.65
44	CV0032	7068.42	3889.14	51.4	5482.64	123.4	NA	2085.7	19.65	451.85	NA	1023.35	1841.68	31.76	644.71	0.03	10.49	433.23	NA	2207.48	509.22	5104.69	71.16	NA	509.49	36.2	2831.69	923.39	32.15	NA	4439.13	372.75	1026.45	15.59	257.13	73782.1	4134.55	134.53	3273.28	NA	NA	273024	429.42	386175	16427.3	308.41	4855.1	3324.73	NA
45	CV0034	NA	1204.52	90.36	3457.25	41.5	24495.8	3539.71	7.31	952.53	103.77	998.96	2922.8	84.4	817.17	8.13	2.3	274.72	8.39	1677.64	441.39	4719.7	9.75	18.17	732.89	19.44	883.06	1167.86	0.76	603.61	5937.13	461.17	594.27	67.65	802.18	15274.3	4628.64	127	2800.05	608.9	22099.6	307158	494.76	987176	NA	289.05	2825.12	3247.72	7943.78
46	CV0035	3240.57	NA	121.55	1183.04	NA	NA	2264.69	NA	1604.14	NA	NA	NA	NA	NA	0.03	23.56	2.3	21.78	495.71	130.39	NA	13.6	9.81	NA	NA	NA	567.89	8.85	NA	3553.17	372.75	293.22	15.59	333.52	37634.2	1351.74	46.15	2191.2	274.05	8506.19	NA	408.7	426200	NA	269.6	NA	2390.1	NA
47	CV0036	11892.5	1221.06	56.04	728.95	4.81	22371.5	5532.12	166.56	NA	100.02	NA	2269.93	123.07	506.75	0.03	19.53	2.3	24.7	1266.64	78.14	NA	13.6	7.17	183.22	3.87	229.82	1305.42	0.76	397.74	10872.9	949.75	617.99	2627.87	202.5	65117	2768.08	22.47	NA	401.34	31746	466593	823.64	1.08334e+06	20153	385	2214.34	4253.95	12442.9
48	CV0037	11842.2	797.43	36.76	3608.05	33.26	22163	2175.39	139.06	401.07	103.77	1018.76	1925.09	218.02	458.5	19.4	10.49	354.77	23.97	467.08	67.17	NA	37.68	7.17	183.22	19.44	1465.77	483.19	0.76	731.3	4199.62	910.92	192.4	35.8	521.79	28106.9	2436.33	94.14	1828.68	442.11	17976.6	376150	682.03	838316	5855.53	318.05	2853.08	2730.28	700.65
49	CV0038	11056.6	1140.78	192.15	4479.93	37.46	21853.5	2353.63	96.96	241.29	10.61	995.71	2210.12	49.86	569.19	0.03	19.53	2.3	29.9	965.4	150.43	7656.3	13.6	18.17	2042.2	25.46	201.91	650.65	0.76	623.89	2712.14	461.17	693.74	67.65	324.55	19687.1	4996.42	105.51	1970.59	328.13	17476.1	430642	739.47	776626	NA	98.72	3421.08	2979.84	12494.4
50	CV0039	10100.8	1831.95	113.97	6630.69	49.2	20918.3	3426.05	32.25	NA	10.61	995.71	4616.26	49.86	530.4	3.52	25.5	2.3	21.78	1045.91	278.3	2654.77	17.52	7.17	183.22	19.44	2388.32	856.54	0.76	168.69	8776.84	910.92	1123.7	101.33	351.33	50069.6	4236.89	123.04	2406	472.25	17426	84479.7	573.37	842077	18954.1	460.48	3687.33	4328.56	7987.45
51	CV0040	7082.65	725.86	82.15	5976.9	63.47	NA	1630.8	174.19	313.94	NA	252.86	2048.5	NA	321.92	4.49	29.25	106.6	NA	953.74	232.13	5468.51	62.69	7.17	183.22	3.16	201.91	771.82	0.76	590.07	3341.34	504.33	179.89	113.74	241.33	86325.6	2512.94	79.41	2251.64	1291.47	12431.8	216324	219.63	544647	9851.9	595.11	2925.85	1808.78	NA
52	CV0041	12516.4	1167.17	164.87	NA	4.81	22255.7	4158.5	110.02	485.18	212.69	1008.2	1628.65	19.15	760.87	0.03	17.41	NA	132.29	942.03	345.67	5277.25	1.5	7.17	2042.2	3.16	NA	788.87	71.12	664.32	4641.89	792.75	237.26	391.54	380.64	140432	12392.6	66.02	NA	240.69	17876.7	110030	569.97	1.20048e+06	11835.6	259.84	5776.97	2586.29	700.65
53	CV0042	13572.4	1564.74	31.55	NA	41.5	21712	4269.95	32.25	1453.03	103.77	998.96	2129.7	73.07	926.84	5.43	16.33	NA	1.37	1124.61	165.22	3332.95	21.48	34.99	183.22	31	1093.34	662.33	0.76	777.93	7324.06	76.42	20.38	137.29	189.22	26604.7	2973.17	50.66	2189.26	12.8	19415.7	318775	219.63	794684	NA	200.65	NA	2346.19	700.65
54	CV0043	3462.26	267.49	82.15	1915.83	98.08	21789.2	NA	92.5	1214.2	447.13	959.02	2368.74	223.17	330.88	2.5	6.47	2.3	NA	658.62	179.83	NA	1.5	7.17	431.54	19.44	3709.39	673.98	1.12	494.57	271.38	671.66	430.4	107.6	NA	58650.2	1975.94	20.52	1891.99	NA	3865.91	181651	191.07	NA	10935.9	240.23	2402.2	4294.66	NA
55	CV0044	9349.38	545.41	65.04	2369.9	76.68	20677.5	2324.02	64.35	313.94	103.77	987.88	2129.7	NA	940.3	0.03	19.53	1809.98	0.07	735.57	160.31	5353.81	1.5	7.17	183.22	45.87	2479.92	884.49	0.76	684.46	2797.47	461.17	396.34	131.54	363.11	67917.2	2397.32	37.97	1548.56	183.15	16062.1	171138	374.06	512976	NA	NA	2735.76	3001.1	700.65
56	CV0045	9812.4	543.82	69.41	579.26	70.18	21095.4	2145.53	74.04	709.61	633.06	998.96	1628.65	NA	366.08	0.03	23.56	11.21	NA	1393.64	19.81	3746.79	13.6	5.64	1014.29	28.28	1347.14	708.75	0.76	404.71	1302.1	280.77	358.79	7.8	345.41	35544.1	1351.74	28.86	1860.48	575.3	8167.11	NA	387.94	760070	13988.4	33.71	NA	1839.23	NA
57	CV0046	10477.8	1112.89	46.66	797.24	60.02	18468.1	2676.91	74.04	25.84	103.77	252.86	1248.34	223.17	732.3	0.03	15.22	150.13	2.57	1330.59	44.41	2453.05	1.5	5.64	82.33	19.44	2999.99	591.72	0.76	369.77	3553.17	546.91	1046.49	44.45	278.92	59710.6	1580.82	15.59	NA	240.69	21130.1	343684	356.69	1.25002e+06	17728	NA	NA	2622.39	NA
58	CV0047	8961.49	1025.72	98.39	NA	28.87	NA	2647.69	110.02	296.06	103.77	252.86	3125.75	19.15	285.33	4.49	15.22	106.6	4.44	918.49	99.48	2765.25	13.6	5.64	183.22	3.87	1223.35	555.92	0.76	596.84	4811.28	988.33	314.67	44.45	119.18	15884.8	3647.39	0.45	1622.13	NA	9841.94	117176	283.27	452619	9746.52	298.74	NA	1112.84	4232.13
59	CV0048	12143	851.81	77.96	2860.8	37.46	20760.4	6658.74	54.25	550.77	382.64	959.02	NA	78.76	674.25	0.03	19.53	811.09	7.72	1068.57	120.21	1943.24	136.17	7.17	267.52	3.16	2831.69	1162.52	0.76	306.28	6446.63	1064.76	279.57	196.21	435.23	78573.8	2906.04	67.79	2583.63	703.22	22292.7	134586	587	769101	19204.3	318.05	3840.79	2844.73	8030.79
60	CV0049	16434.1	773.71	244	728.95	24.22	19765.5	3539.71	69.24	164.8	103.77	959.02	3415.07	171.18	629.81	0.03	32.86	2.3	28.41	578.88	19.81	5878.13	1.5	7.17	351.15	16.17	201.91	934.45	0.76	1369.52	7591.8	417.34	479.96	52.56	426.7	47455.8	3071.73	5.77	2047.54	122.16	19760.5	113768	593.8	893967	NA	NA	2998.72	3359.66	700.65
61	CV0050	15862.6	515.1	65.04	742.59	24.22	22524	3653	143.07	222.59	1313.95	987.88	3015.49	149.98	553.76	0.03	22.57	NA	9.07	953.74	72.68	4332.44	1.5	7.17	1413.93	25.46	2479.92	1027.71	0.76	1021.37	4439.13	712.39	81.51	35.8	597.86	94787.6	4533.15	27.09	1765.27	218	17375.8	146128	827	699851	12567.5	298.74	3727.08	2816.17	700.65

## Sheet: scRNA_sequencing_depth
	5' GEX				Hashtags	VDJ
						TCR		BCR
Samples	No of cells	Mean reads per cell	Median genes per cell	Sequencing Saturation	Mean reads per cell	No of cells	Mean reads per cell	No of cells	Mean reads per cell
Control	4287	29674	1196	0.606	6535	1781	15738	1182	26612
Contact	8924	25947	1022	0.592	4413	2011	21964	1892	21033
PCR Positive	7558	40455	840	0.595	5940	2931	11011	2220	13129
